# Supplementary material for: Oxygenation, Life, and the Planetary System during Earth's Middle History: An Overview
Source: PubMed Central journal article supplement (PMC8403206; doi:10.1089/ast.2020.2418), 2021-08-16
Supplement: Supp_Data.pdf [file Supp_Data.pdf]

## Supplementary Information:

**Figure S1.** Annotated version of Figure 1 and accompanying table. References for evolutionary milestones are listed at the bottom of the table.

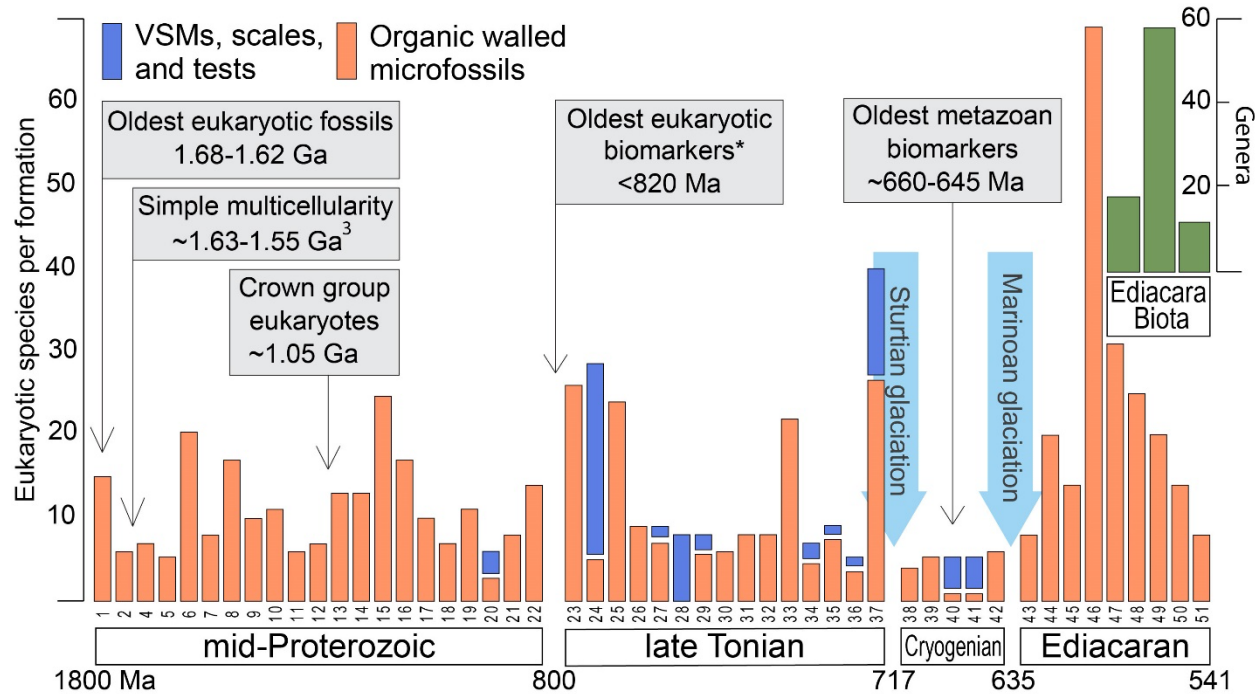

| No. | Formation or Group      | Approximate Age (Ma) | Eukaryotic Diversity | Primary References                                |
|-----|-------------------------|----------------------|----------------------|---------------------------------------------------|
| 1   | Changzhougou Formation  | 1650                 | 15                   | Lamb et al., 2009; Zhang, 1997                    |
| 2   | Chengcheng Formation    | 1650                 | 6                    | Miao et al., 2019                                 |
| 3   | Tuanshanzi Formation    | 1630                 | 3                    | Qu et al., 2018                                   |
| 4   | Ruyang Group            | 1645                 | 7                    | Yin et al., 2005; Agić et al., 2017               |
| 5   | Gaoyuzhuang Formation   | 1560                 | 5                    | Shi et al., 2017                                  |
| 6   | Beidajian Formation     | 1500                 | 20                   | Agić et al., 2017                                 |
| 7   | Roper Group             | 1455                 | 8                    | Javaux et al., 2004; Javaux and Knoll, 2017       |
| 8   | Kaltasy Formation       | 1435                 | 17                   | Sergeev et al., 2016                              |
| 9   | Thule Supergroup        | 1135                 | 10                   | Samuelsson et al., 1999                           |
| 10  | Atar/El Mariti Group    | 1100                 | 11                   | Beghin et al., 2017                               |
| 11  | Nonesuch Shale          | 1095                 | 6                    | Strother et al., 2011                             |
| 12  | Olenek Uplift           | 1050                 | 7                    | Stanevich et al., 2009                            |
| 13  | Torrionian Succession   | 1025                 | 13                   | Battison and Brasier, 2012; Strother et al., 2012 |
| 14  | Lakhanda Group          | 1025                 | 13                   | Jankauskas, 1989                                  |
| 15  | Shaler Group            | ~1000                | 25                   | Loron and Moczydłowska, 2018                      |
| 16  | Tongjiazhuang Formation | ~1000                | 17                   | Li et al., 2019                                   |

|    |                                        |         |    |                                                                             |
|----|----------------------------------------|---------|----|-----------------------------------------------------------------------------|
| 17 | Mbuji-Mayi Supergroup                  | 975     | 10 | Baludikay et al., 2016                                                      |
| 18 | Halkal / Hulkal Formation              | 895     | 7  | Sharma and Shukla, 2012; Maithy and Babu, 1996                              |
| 19 | Liulaobei Formation                    | 850     | 11 | Tang et al., 2013                                                           |
| 20 | Huainan Group                          | 850     | 6  | Xiao et al., 2014a                                                          |
| 21 | Basinal Assemblage of Little Dal Group | >820    | 8  | Hofmann, 1985                                                               |
| 22 | Wynniatt Formation                     | >810    | 14 | Hofmann and Rainbird, 1994; Butterfield and Rainbird, 1998                  |
| 23 | Alinya Formation                       | 800     | 26 | Zang, 1995; Riedman and Porter, 2016                                        |
| 24 | Fifteenmile Group                      | 800     | 28 | Allison and Hilgert, 1986; Allison and Awramik, 1989; Cohen and Knoll, 2012 |
| 25 | Svanbergfjellet Formation              | 800     | 24 | Butterfield et al., 1994                                                    |
| 26 | Hunnberg Formation                     | 790     | 9  | Knoll, 1984                                                                 |
| 27 | Chichikan Formation                    | 785     | 9  | Sergeev and Schopf, 2010                                                    |
| 28 | Urucum Formation                       | 766     | 8  | Morais et al., 2017                                                         |
| 29 | Draken Formation                       | 765     | 8  | Knoll et al., 1991                                                          |
| 30 | Backlundtoppen Formation               | 765     | 6  | Knoll et al., 1989                                                          |
| 31 | Batsfjord Formation                    | 760     | 8  | Vidal and Siedlecka, 1983                                                   |
| 32 | Visingsö Group (Lower and Middle)      | 760     | 8  | Vidal, 1976                                                                 |
| 33 | Visingsö Group (upper)                 | 750     | 22 | Loren and Moczydłowska, 2018; Vidal, 1976                                   |
| 34 | Ryso Formation                         | 745     | 7  | Knoll and Calder, 1983                                                      |
| 35 | Uinta Mountain Group                   | 740     | 9  | Dehler et al., 2010                                                         |
| 36 | Pahrump Group, Death Valley            | 740     | 5  | Corsetti et al., 2003                                                       |
| 37 | Chuar Group                            | 740     | 39 | Vidal and Ford, 1985; Nagy et al., 2007; Porter et al., 2003; Porter, 2016  |
| 38 | Areyonga Formation                     | 660     | 4  | Riedman et al., 2014                                                        |
| 39 | Aralka Formation                       | 660     | 5  | Riedman et al., 2014                                                        |
| 40 | Rasthof Formation                      | 660     | 5  | Bosak et al., 2011a; Dalton et al., 2013                                    |
| 41 | Tayshir Formation                      | 660     | 5  | Bosak et al., 2011b                                                         |
| 42 | Tapley Hill Formation                  | 650     | 6  | Riedman et al., 2014                                                        |
| 43 | Lantian Formation                      | <635    | 8  | Xunlai et al., 1999; Yuan et al., 2001                                      |
| 44 | Ura Formation                          | <635    | 20 | Sergeev et al., 2011                                                        |
| 45 | Parsha Formation                       | <635    | 14 | Golubkova et al., 2010                                                      |
| 46 | Doushantuo Formation                   | 635-580 | 69 | Xiao et al., 2002; Xiao et al., 2004; Xiao et al., 2014b                    |
| 47 | Dey-Dey Formation-Officer Basin        | 580-560 | 31 | Grey, 2005                                                                  |
| 48 | Dey-Dey Formation-Amadaeus Basin       | 580-560 | 25 | Zang and Walter, 1992                                                       |
| 49 | Kelt'ma Assemblage                     | 580-552 | 20 | Vorob'eva et al., 2009                                                      |
| 50 | Redkino Suite                          | 550     | 14 | Burzin et al., 1996                                                         |

|    |                                |           |   |                                                                            |
|----|--------------------------------|-----------|---|----------------------------------------------------------------------------|
| 51 | Nama Group                     | 550       | 8 | Germis et al., 1986; Cohen et al., 2009                                    |
|    |                                |           |   |                                                                            |
|    | Oldest eukaryotic microfossils | 1680-1620 |   | Knoll and Nowak, 2017; Javaux and Lepot, 2018                              |
|    | Simple multicellularity        | 1630-1550 |   | Zhu et al., 2016                                                           |
|    | Crown group eukaryotes         | 1.05      |   | Butterfield, 2000; Gibson et al., 2017; but see also Bengtson et al., 2017 |
|    | Oldest eukaryotic biomarkers   | ~800      |   | Brocks et al., 2017                                                        |
|    | Oldest metazoan biomarkers     | ~660-645  |   | Love et al., 2009; Love and Summons, 2015                                  |

**Figure S2.** Annotated version of Figure 3 with accompanying table.

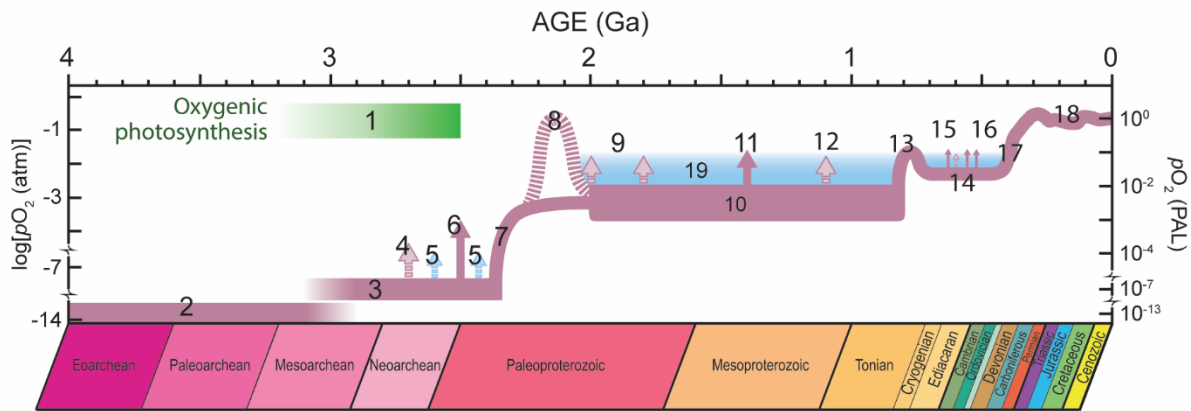

| No. | Explanation                                                                                                                                                                                                                                                                                                                                                                                                                                                                                                                                                                                                              | References                                                                                                   |
|-----|--------------------------------------------------------------------------------------------------------------------------------------------------------------------------------------------------------------------------------------------------------------------------------------------------------------------------------------------------------------------------------------------------------------------------------------------------------------------------------------------------------------------------------------------------------------------------------------------------------------------------|--------------------------------------------------------------------------------------------------------------|
| 1   | The evolution of oxygenic photosynthesis occurred prior to the end of the Archaean.                                                                                                                                                                                                                                                                                                                                                                                                                                                                                                                                      | Planavsky et al., 2014a; Satkoski et al., 2015                                                               |
| 2   | Prior to the evolution of oxygenic photosynthesis, O <sub>2</sub> production restricted to photolytic reactions in the upper atmosphere involving CO <sub>2</sub> and H <sub>2</sub> O.                                                                                                                                                                                                                                                                                                                                                                                                                                  | Kasting and Walker, 1981                                                                                     |
| 3   | After the evolution of oxygenic photosynthesis, dynamic models suggest system stability ~10 <sup>-7</sup> PAL.                                                                                                                                                                                                                                                                                                                                                                                                                                                                                                           | Pavlov and Kasting, 2002; Goldblatt et al., 2006                                                             |
| 4   | Possible ‘whiff’ of O <sub>2</sub> or oxygen oasis suggested from Jeerinah Formation, Western Australia.                                                                                                                                                                                                                                                                                                                                                                                                                                                                                                                 | Scott et al., 2011                                                                                           |
| 5   | Hypothetical oscillations predicted to accompany the GOE transition because of low buffering capacity of the system nearing conditions that favored change in steady state.                                                                                                                                                                                                                                                                                                                                                                                                                                              |                                                                                                              |
| 6   | Confident ‘whiff’ of O <sub>2</sub> prior to the GOE recorded in the Mt. McRae Shale, Western Australia.                                                                                                                                                                                                                                                                                                                                                                                                                                                                                                                 | Anbar et al., 2007                                                                                           |
| 7   | ‘Great Oxidation Event’ dated to ~2.33 Ga by the disappearance of non-mass-dependent fractionation of sulfur observed in pyrite.                                                                                                                                                                                                                                                                                                                                                                                                                                                                                         | Luo et al., 2016                                                                                             |
| 8   | Potential O <sub>2</sub> ‘overshoot’ suggested by interpretation of the Lomagundi Event (~200 Myr interval of extremely <sup>13</sup> C enriched carbonate rocks) as the product of enhanced burial of oxygenic-photosynthetically derived organic carbon; significant uncertainty surrounds this interpretation, including the possibility that O <sub>2</sub> gained passed only transiently through the atmosphere and accumulated rather as elevated oxidant availability in the oceans (e.g., sulfate). Also poorly known are the controls on declining O <sub>2</sub> /oxidants at the end of the Lomagundi Event. | Bekker and Holland, 2012; cf., Krissansen-Totton et al., 2015; Blättler et al., 2018; Ossa Ossa et al., 2018 |
| 9   | Potential transient oxygenation events in the later                                                                                                                                                                                                                                                                                                                                                                                                                                                                                                                                                                      | Planavsky et al., 2018; Mänd et al., 2020                                                                    |

|    |                                                                                                                                                                                                                                                                                 |                                                                                                      |
|----|---------------------------------------------------------------------------------------------------------------------------------------------------------------------------------------------------------------------------------------------------------------------------------|------------------------------------------------------------------------------------------------------|
|    | Paleoproterozoic (after the falling limb of the Lomagundi carbon isotope excursion at ~2.0 and 1.8 Ga)                                                                                                                                                                          |                                                                                                      |
| 10 | Low atmospheric O <sub>2</sub> levels (0.1-1% PAL based on the $\delta^{53}\text{Cr}$ record in iron formations and shales) characterized the bulk of the mid-Proterozoic.                                                                                                      | Planavsky et al., 2014b; Cole et al., 2016                                                           |
| 11 | Multiple lines of evidence point to a transient increase in O <sub>2</sub> ~1.4 Ga.                                                                                                                                                                                             | Zhang et al., 2016; Liu et al., 2016; Hardisty et al., 2017; Yang et al., 2017; Diamond et al., 2018 |
| 12 | The $\delta^{53}\text{Cr}$ record of carbonates suggests the possibility of transient oxygenation ~1.1 Ga.                                                                                                                                                                      | Gilleaudeau et al., 2016                                                                             |
| 13 | The $\delta^{53}\text{Cr}$ record of iron formations, iron stones, and organic rich shales shows significant fractionations beginning ~800 Ma, indicating the onset of oxidative Cr cycling in terrestrial weathering environments.                                             | Planavsky et al., 2014; Cole et al., 2016                                                            |
| 14 | Multiple lines of evidence indicate that widespread anoxic conditions persisted through the bulk of the late Neoproterozoic and early Palaeozoic.                                                                                                                               | Sperling et al., 2015; Wallace et al., 2017                                                          |
| 15 | Transient spikes in redox-sensitive trace metal concentrations in the Doushantuo Formation indicate transient reductions in spatial extent of anoxic marine conditions.                                                                                                         | Sahoo et al., 2016; Shi et al., 2018                                                                 |
| 16 | Multiple studies have suggested oxygenation in the Middle Cambrian (~521 Ma) on the basis of various proxies applied to strata of south China, other work has shown a subsequent continuation of widespread anoxia, indicating that this event was likely transient if genuine. | Chen et al., 2015; Jin et al., 2017; Li et al., 2017                                                 |
| 17 | A stepwise increase to near modern $p\text{O}_2$ is suggested to have accompanied the rise of vascular land plants; multiple lines of evidence support this notion.                                                                                                             | Dahl et al., 2010; Lenton et al., 2016; Wallace et al., 2017                                         |
| 18 | Remainder of $p\text{O}_2$ curve adapted from GEOCARBSULF, which is based on the $\delta^{13}\text{C}$ record of marine carbonates.                                                                                                                                             | Berner, 2006; Schachat et al., 2018                                                                  |
| 19 | Some model predictions suggest a lack of stability in the $p\text{O}_2$ range consistent with the $\delta^{53}\text{Cr}$ record and instead argue for higher (1-10% PAL) $p\text{O}_2$ throughout the mid-Proterozoic.                                                          | Daines et al., 2017                                                                                  |

## Supplementary References:

- Agić, H., Moczyłowska, M., and Yin, L. (2017) Diversity of organic-walled microfossils from the early Mesoproterozoic Ruyang Group, North China Craton—A window into the early eukaryote evolution. *Precambrian Res* 297:101-130.
- Allison, C.W. and Awramik, S.M. (1998) Organic-walled microfossils from earliest Cambrian or latest Proterozoic Tindir Group rocks, northwest Canada. *Precambrian Res* 43:253-294.
- Allison, C.W. and Hilgert, J.W. (1986) Scale microfossils from the Early Cambrian of northwest Canada. *J Paleontol* 60:973-1015.
- Anbar, A.D., Duan, Y., Lyons, T.W., Arnold, G.L., Kendall, B., Creaser, R.A., Kaufman, A.J., Gordon, G.W., Scott, C., Garvin, J., and Buick, R. (2007) A whiff of oxygen before the great oxidation event? *Science* 317:1903-1906.
- Baludikay, B.K., Storme, J.Y., François, C., Baudet, D., and Javaux, E.J. (2016) A diverse and exquisitely preserved organic-walled microfossil assemblage from the Meso–Neoproterozoic Mbuji-Mayi Supergroup (Democratic Republic of Congo) and implications for Proterozoic biostratigraphy. *Precambrian Res* 281:166-184.
- Battison, L. and Brasier, M.D. (2012) Remarkably preserved prokaryote and eukaryote microfossils within 1 Ga-old lake phosphates of the Torridon Group, NW Scotland. *Precambrian Res* 196:204-217.
- Bekker, A. and Holland, H.D. (2012) Oxygen overshoot and recovery during the early Paleoproterozoic. *Earth Planet Sci Lett* 317:295-304.
- Beghin, J., Storme, J.Y., Blanpied, C., Gueneli, N., Brocks, J.J., Poulton, S.W., and Javaux, E.J. (2017) Microfossils from the late Mesoproterozoic–early Neoproterozoic Atar/el Mreïti group, Taoudeni basin, Mauritania, northwestern Africa. *Precambrian Res* 291:63-82.
- Bengtson, S., Sallstedt, T., Belivanova, V., and Whitehouse, M. (2017) Three-dimensional preservation of cellular and subcellular structures suggests 1.6 billion-year-old crown-group red algae. *PLoS Biol* 15:e2000735.
- Berner, R. A. (2006) GEOCARBSULF: a combined model for Phanerozoic atmospheric O<sub>2</sub> and CO<sub>2</sub>. *Geochim Cosmochim Acta* 70:5653-5664.
- Blättler, C.L., Claire, M.W., Prave, A.R., Kirsimäe, K., Higgins, J.A., Medvedev, P.V., Romashkin, A.E., Rychanchik, D.V., Zerkle, A.L., Paiste, K., and Kreitsmann, T. (2018) Two-billion-year-old evaporites capture Earth's great oxidation. *Science* 360:320-323.
- Bosak, T., Lahr, D.J.G., Pruss, S.B., Macdonald, F.A., Dalton, L., and Matys, E. (2011a) Agglutinated tests in post-Sturtian cap carbonates of Namibia and Mongolia. *Earth Planet Sci Lett* 308:29-40.
- Bosak, T., Macdonald, F., Lahr, D., and Matys, E. (2011b) Putative Cryogenian ciliates from Mongolia. *Geology* 39:1123-1126.
- Brocks, J.J., Jarrett, A.J., Sirantoine, E., Hallmann, C., Hoshino, Y., and Liyanage, T. (2017) The rise of algae in Cryogenian oceans and the emergence of animals. *Nature* 548:578-581.

Burzin, M.B. (1996) Late Vendian (Neoproterozoic III) microbial and algal communities of the Russian Platform: models of facies-dependent distribution, evolution and reflection of basin development. *Rivista Italiana di Paleontologia e Stratigrafia (Research In Paleontology and Stratigraphy)* 102.

Butterfield, N.J. (2000) *Bangiomorpha pubescens* n. gen., n. sp.: implications for the evolution of sex, multicellularity, and the Mesoproterozoic/Neoproterozoic radiation of eukaryotes. *Paleobiology* 26:386-404.

Butterfield, N.J., Knoll, A.H., and Swett, K. (1994) Paleobiology of the Neoproterozoic Svanbergfjellet Formation, Spitsbergen. *Lethaia* 27:76-76.

Butterfield, N.J. and Rainbird, R.H. (1998) Diverse organic-walled fossils, including “possible dinoflagellates,” from the early Neoproterozoic of arctic Canada. *Geology* 26:963-966.

Chen, X., Ling, H.F., Vance, D., Shields-Zhou, G.A., Zhu, M., Poulton, S.W., Och, L.M., Jiang, S.Y., Li, D., Cremonese, L., and Archer, C. (2015) Rise to modern levels of ocean oxygenation coincided with the Cambrian radiation of animals. *Nature Comm* 6:1-7.

Cohen, P.A., Bradley, A., Knoll, A.H., Grotzinger, J.P., Jensen, S., Abelson, J., Hand, K., Love, G., Metz, J., McLoughlin, N., and Meister, P. (2009) Tubular compression fossils from the Ediacaran Nama group, Namibia. *J Paleontol* 83:110-122.

Cohen, P.A. and Knoll, A.H. (2012) Scale microfossils from the mid-Neoproterozoic Fifteenmile Group, Yukon Territory. *J Paleontol* 86:775-800.

Cole, D.B., Reinhard, C.T., Wang, X., Gueguen, B., Halverson, G.P., Gibson, T., Hodgskiss, M.S., McKenzie, N.R., Lyons, T.W., and Planavsky, N.J. (2016) A shale-hosted Cr isotope record of low atmospheric oxygen during the Proterozoic. *Geology* 44:555-558.

Corsetti, F.A., Awramik, S.M., and Pierce, D.A. (2003) Complex microbiota from snowball Earth times: microfossils from the Neoproterozoic Kingston Peak Formation, Death Valley, USA. *Proc Natl Acad Sci USA* 100:4399-4404.

Dahl, T.W., Hammarlund, E.U., Anbar, A.D., Bond, D.P., Gill, B.C., Gordon, G.W., Knoll, A.H., Nielsen, A.T., Schovsbo, N.H., and Canfield, D.E. (2010) Devonian rise in atmospheric oxygen correlated to the radiations of terrestrial plants and large predatory fish. *Proc Natl Acad Sci USA* 107:17911-17915.

Daines, S.J., Mills, B.J., and Lenton, T.M. (2017) Atmospheric oxygen regulation at low Proterozoic levels by incomplete oxidative weathering of sedimentary organic carbon. *Nature Comm* 8:14379.

Dehler, C. M., Fanning, C. M., Link, P. K., Kingsbury, E. M., and Rybczynski, D. (2010) Maximum depositional age and provenance of the Uinta Mountain Group and Big Cottonwood Formation, northern Utah: Paleogeography of rifting western Laurentia. *Geol Soc Am Bull* 122:1686-1699.

Diamond, C.W., Planavsky, N.J., Wang, C., and Lyons, T.W. (2018) What the ~1.4 Ga Xiamaling Formation can and cannot tell us about the mid-Proterozoic ocean. *Geobiology* 16:219-236.

Germis, G.J., Knoll, A.H., and Vidal, G. (1986) Latest Proterozoic microfossils from the Nama Group, Namibia (South West Africa). *Precambrian Res* 32:45-62.

- Gibson, T.M., Shih, P.M., Cumming, V.M., Fischer, W.W., Crockford, P.W., Hodgskiss, M.S., Wörndle, S., Creaser, R.A., Rainbird, R.H., Skulski, T.M., and Halverson, G.P. (2018) Precise age of *Bangiomorpha pubescens* dates the origin of eukaryotic photosynthesis. *Geology* 46:135-138.
- Gilleaudeau, G.J., Frei, R., Kaufman, A.J., Kah, L.C., Azmy, K., Bartley, J.K., Chernyavskiy, P., and Knoll, A.H. (2016) Oxygenation of the mid-Proterozoic atmosphere: clues from chromium isotopes in carbonates. *Geochem Perspect Lett* 2:178-187.
- Goldblatt, C., Lenton, T.M., and Watson, A.J. (2006) Bistability of atmospheric oxygen and the Great Oxidation. *Nature* 443:683.
- Golubkova, E.Y., Raevskaya, E.G., and Kuznetsov, A.B. (2010) Lower Vendian microfossil assemblages of East Siberia: significance for solving regional stratigraphic problems. *Strat Geol Corr* 18:353-375.
- Grey, K. *Ediacaran palynology of Australia*. 31, (Association of Australasian Palaeontologists, 2005).
- Hardisty, D.S., Lu, Z., Bekker, A., Diamond, C.W., Gill, B.C., Jiang, G., Kah, L.C., Knoll, A.H., Loyd, S.J., Osburn, M.R., and Planavsky, N.J. (2017) Perspectives on Proterozoic surface ocean redox from iodine contents in ancient and recent carbonate. *Earth Planet Sci Lett* 463:159-170.
- Hofmann, H.J. (1985) The mid-Proterozoic Little Dal macrobiota, Mackenzie Mountains, north-west Canada. *Palaeontol* 28:331-354.
- Hofmann, H. J. & Rainbird, R. H. Carbonaceous megafossils from the Neoproterozoic Shaler Supergroup of Arctic Canada. *Palaeontol* 37, 721-732 (1994).
- Jankauskas, T.V., Mikhailova, N.S., and Hermann, T.N. (1989) Mikrofosilii dokembriya SSSR [Precambrian Microfossils of the USSR]. *Trudy Instituta Geologii i Geochronologii Dokembria SSSR Akademii Nayk, Leningrad* 188.
- Javaux, E.J. and Knoll, A.H., (2017) Micropaleontology of the lower Mesoproterozoic Roper Group, Australia, and implications for early eukaryotic evolution. *J Paleontol* 91:199-229.
- Javaux, E.J. and Lepot, K. (2018) The Paleoproterozoic fossil record: implications for the evolution of the biosphere during Earth's middle-age. *Earth Sci Rev* 176:68-86.
- Javaux, E.J., Knoll, A.H., and Walter, M.R. (2004) TEM evidence for eukaryotic diversity in mid-Proterozoic oceans. *Geobiology* 2:121-132.
- Jin, C., Li, C., Algeo, T.J., Cheng, M., Lei, L., Zhang, Z., and Shi, W.E.I. (2017) Evidence for marine redox control on spatial colonization of early animals during Cambrian Age 3 (c. 521–514 Ma) in South China. *Geol Mag* 154:1360-1370.
- Kasting, J.F. and Walker, J.C. (1981) Limits on oxygen concentration in the prebiological atmosphere and the rate of abiotic fixation of nitrogen. *J Geophys Res Oceans* 86:1147-1158.
- Knoll, A.H. and Calder, S. (1983) Microbiotas of the late Precambrian Ryssö Formation, Nordaustlandet, Svalbard. *Palaeontol* 26:467-496.
- Knoll, A.H. (1984) Microbiotas of the late Precambrian Hunnberg Formation, Nordaustlandet, Svalbard. *J Paleontol* 58:131-162.



- Knoll, A.H., Swett, K., and Burkhardt, E. (1989) Paleoenvironmental distribution of microfossils and stromatolites in the Upper Proterozoic Backlundtoppen Formation, Spitsbergen. *J Paleontol* 63:129-145.
- Knoll, A.H., Swett, K., and Mark, J. (1991) Paleobiology of a Neoproterozoic tidal flat/lagoonal complex: the Draken Conglomerate Formation, Spitsbergen. *J Paleontol* 65:531-570.
- Knoll, A.H. and Nowak, M.A. (2017) The timetable of evolution. *Science Adv* 3:e1603076.
- Krause, A.J., Mills, B.J., Zhang, S., Planavsky, N.J., Lenton, T.M., and Poulton, S.W. (2018) Stepwise oxygenation of the Paleozoic atmosphere. *Nature Comm* 9:1-10.
- Krissansen-Totton, J., Buick, R., and Catling, D.C.A. (2015) Statistical analysis of the carbon isotope record from the Archean to Phanerozoic and implications for the rise of oxygen. *Am J Sci* 315:275-316.
- Lamb, D.M., Awramik, S.M., Chapman, D.J., and Zhu, S. (2009) Evidence for eukaryotic diversification in the ~1800 million-year-old Changzhougou Formation, North China. *Precambrian Res* 173:93-104.
- Lenton, T.M., Dahl, T.W., Daines, S.J., Mills, B.J., Ozaki, K., Saltzman, M.R., and Porada, P. (2016) Earliest land plants created modern levels of atmospheric oxygen. *Proc Natl Acad Sci USA* 113:9704-9709.
- Li, C., Jin, C., Planavsky, N.J., Algeo, T.J., Cheng, M., Yang, X., Zhao, Y., and Xie, S. (2017) Coupled oceanic oxygenation and metazoan diversification during the early–middle Cambrian? *Geology* 45:743-746.
- Li, G., Pang, K., Chen, L., Zhou, G., Han, C., Yang, L., Wang, W., Yang, F., and Yin, L. (2019) Organic-walled microfossils from the Tonian Tongjiashuang Formation of the Tumen Group in western Shandong, North China Craton and their biostratigraphic significance. *Gondwana Res* 76:260-289.
- Liu, X.M., Kah, L.C., Knoll, A.H., Cui, H., Kaufman, A.J., Shaha, A., and Hazen, R.M. (2015) Tracing Earth's O<sub>2</sub> evolution using Zn/Fe ratios in marine carbonates. *Geochem Perspect Lett* 2:24-34.
- Loron, C. and Moczyłowska, M. (2018) Tonian (Neoproterozoic) eukaryotic and prokaryotic organic-walled microfossils from the upper Visingsö Group, Sweden. *Palynology* 42:220-254.
- Loron, C.C., Rainbird, R.H., Turner, E.C., Greenman, J.W., and Javaux, E.J. (2019) Organic-walled microfossils from the late Mesoproterozoic to early Neoproterozoic lower Shaler Supergroup (Arctic Canada): diversity and biostratigraphic significance. *Precambrian Res* 321:349-374.
- Love, G.D., Grosjean, E., Stalvies, C., Fike, D.A., Grotzinger, J.P., Bradley, A.S., Kelly, A.E., Bhatia, M., Meredith, W., Snape, C.E., and Bowring, S.A. (2009) Fossil steroids record the appearance of Demospongiae during the Cryogenian period. *Nature* 457:718-721.
- Love, G.D. and Summons, R.E. (2015) The molecular record of Cryogenian sponges—a response to Antcliffe (2013). *Palaeontol* 58:1131-1136.
- Luo, G., Ono, S., Beukes, N.J., Wang, D.T., Xie, S., and Summons, R.E. (2016) Rapid oxygenation of Earth's atmosphere 2.33 billion years ago. *Science Adv* 2:e1600134.

Maithy, P. K. and Babu, R. (1996) Carbonaceous macrofossils and organic-walled microfossils from the Halkal Formation, Bhima Group, Karnataka with remarks on age. *Palaeobotanist* 45:1-6.

Mänd, K., Lalonde, S.V., Robbins, L.J., Thoby, M., Paiste, K., Kreitsmann, T., Paiste, P., Reinhard, C.T., Romashkin, A.E., Planavsky, N.J. and Kirsimäe, K. (2020) Palaeoproterozoic oxygenated oceans following the Lomagundi–Jatuli Event. *Nature Geoscience* 13:302-306.

Miao, L., Moczyłowska, M., Zhu, S., and Zhu, M. (2019) New record of organic-walled, morphologically distinct microfossils from the late Paleoproterozoic Changcheng Group in the Yanshan Range, North China. *Precambrian Res* 321:172-198.

Morais, L., Fairchild, T.R., Lahr, D.J., Rudnitzki, I.D., Schopf, J.W., Garcia, A.K., Kudryavtsev, A.B., and Romero, G.R. (2017) Carbonaceous and siliceous Neoproterozoic vase-shaped microfossils (Urucum Formation, Brazil) and the question of early protistan biomineralization. *J Paleontol* 91:393-406.

Nagy, R.M., Porter, S.M., Dehler, C.M., and Shen, Y. (2009) Biotic turnover driven by eutrophication before the Sturtian low-latitude glaciation. *Nature Geosci* 2:415-418.

Ossa Ossa, F., Eickmann, B., Hofmann, A., Planavsky, N.J., Asael, D., Pambo, F., and Bekker, A. (2018) Two-step deoxygenation at the end of the Paleoproterozoic Lomagundi Event. *Earth Planet Sci Lett* 486:70-83.

Pavlov, A.A. and Kasting, J.F. (2002) Mass-independent fractionation of sulfur isotopes in Archean sediments: strong evidence for an anoxic Archean atmosphere. *Astrobiology* 2:27-41.

Planavsky, N.J., Asael, D., Hofmann, A., Reinhard, C.T., Lalonde, S.V., Knudsen, A., Wang, X., Ossa, F.O., Pecoits, E., Smith, A.J., and Beukes, N.J. (2014a) Evidence for oxygenic photosynthesis half a billion years before the Great Oxidation Event. *Nature Geosci* 7:283-286.

Planavsky, N.J., Reinhard, C.T., Wang, X., Thomson, D., McGoldrick, P., Rainbird, R.H., Johnson, T., Fischer, W.W., and Lyons, T.W. (2014b) Low Mid-Proterozoic atmospheric oxygen levels and the delayed rise of animals. *Science* 346:635-638.

Planavsky, N.J., Cole, D.B., Isson, T.T., Reinhard, C.T., Crockford, P.W., Sheldon, N.D., and Lyons, T.W. (2018) A case for low atmospheric oxygen levels during Earth's middle history. *Emerging Topics Life Sci* 2:149-159.

Porter, S.M. (2016) Tiny vampires in ancient seas: evidence for predation via perforation in fossils from the 780–740 million-year-old Chuar Group, Grand Canyon, USA. *Proc Royal Soc B: Biolo Sci* 283:20160221.

Porter, S.M., Meisterfeld, R., and Knoll, A.H. (2003) Vase-shaped microfossils from the Neoproterozoic Chuar Group, Grand Canyon: a classification guided by modern testate amoebae. *J Paleontol* 77:409-429.

Qu, Y., Zhu, S., Whitehouse, M., Engdahl, A., and McLoughlin, N. (2018) Carbonaceous biosignatures of the earliest putative macroscopic multicellular eukaryotes from 1630 Ma Tuanshanzi Formation, north China. *Precambrian Res* 304:99-109.

Riedman, L.A. and Porter, S. (2016) Organic-walled microfossils of the mid-Neoproterozoic Alinya Formation, Officer Basin, Australia. *J Paleontol* 90:854-887.

Riedman, L.A., Porter, S.M., Halverson, G.P., Hurtgen, M.T., and Junium, C.K. Organic-walled microfossil assemblages from glacial and interglacial Neoproterozoic units of Australia and Svalbard. *Geology* 42:1011-1014.

Sahoo, S.K., Planavsky, N.J., Jiang, G., Kendall, B., Owens, J.D., Wang, X., Shi, X., Anbar, A.D., and Lyons, T.W. (2016) Oceanic oxygenation events in the anoxic Ediacaran ocean. *Geobiology* 14:457-468.

Samuelsson, J., Dawes, P.R., and Vidal, G. (1999) Organic-walled microfossils from the Proterozoic Thule Supergroup, northwest Greenland. *Precambrian Res* 96:1-23.

Satkoski, A.M., Beukes, N.J., Li, W., Beard, B.L., and Johnson, C.M. (2015) A redox-stratified ocean 3.2 billion years ago. *Earth Planet Sci Lett* 430:43-53.

Schachat, S.R., Labandeira, C.C., Saltzman, M.R., Cramer, B.D., Payne, J.L., and Boyce, C.K. (2018) Phanerozoic  $pO_2$  and the early evolution of terrestrial animals. *Proc R Soc B* 285:20172631.

Scott, C.T., Bekker, A., Reinhard, C.T., Schmetzer, B., Krapež, B., Rumble III, D., and Lyons, T.W. (2011) Late Archean euxinic conditions before the rise of atmospheric oxygen. *Geology* 39:119-122.

Sergeev, V.N., Knoll, A.H., and Vorob'eva, N.G. (2011) Ediacaran microfossils from the Ura Formation, Baikalsk-Uplift, Siberia: taxonomy and biostratigraphic significance. *J Paleontol* 85:987-1011.

Sergeev, V.N., Knoll, A.H., Vorob'eva, N.G., and Sergeeva, N.D. (2016) Microfossils from the lower Mesoproterozoic Kalties Formation, East European Platform. *Precambrian Res* 278:87-107.

Sergeev, V.N. and Schopf, J.W. (2010) Taxonomy, paleoecology and biostratigraphy of the late Neoproterozoic Chichkan microbiota of South Kazakhstan: The marine biosphere on the eve of metazoan radiation. *J Paleontol* 84:363-401.

Sharma, M. and Shukla, Y. (2012) Occurrence of helically coiled microfossil *Obruchevella* in the Owk Shale of the Kurnool Group and its significance. *J Earth Syst Sci* 121:755-768.

Shi, M., Feng, Q., Khan, M.Z., and Zhu, S. (2017) An eukaryote-bearing microbiota from the early Mesoproterozoic Gaoyuzhuang Formation, Tianjin, China and its significance. *Precambrian Res* 303:709-726.

Shi, W., Li, C., Luo, G., Huang, J., Algeo, T.J., Jin, C., Zhang, Z., and Cheng, M. (2018) Sulfur isotope evidence for transient marine-shelf oxidation during the Ediacaran Shuram Excursion. *Geology* 46:267-270.

Sperling, E.A., Wolock, C.J., Morgan, A.S., Gill, B.C., Kunzmann, M., Halverson, G.P., Macdonald, F.A., Knoll, A.H., and Johnston, D.T. (2015) Statistical analysis of iron geochemical data suggests limited late Proterozoic oxygenation. *Nature* 523:451-454.

Stanevich, A.M., Maksimova, E.N., Kornilova, T.A., Gladkochub, D.P., Mazukabzov, A.M., and Donskaya, T.V. (2009) Microfossils from the Arymas and Debengda formations, the Riphean of the Olenek Uplift: Age and presumable nature. *Strat Geol Corr* 17:20-35.

Strother, P.K. (2011) Surprisingly high biotic diversity in a Neoproterozoic shale. *GSA Annual Meeting in Minneapolis*.

- Strother, P.K. (2012) Paleobiology of earliest Neoproterozoic lakes. *GSA Annual Meeting in Charlotte*.
- Tang, Q., Pang, K., Xiao, S., Yuan, X., Ou, Z., and Wan, B. (2013) Organic-walled microfossils from the early Neoproterozoic Liulaobei Formation in the Huainan region of North China and their biostratigraphic significance. *Precambrian Res* 236:157-181.
- Vidal, G. (1976) *Late Precambrian microfossils from the Visingsö Beds in southern Sweden*. Universitetsforlaget.
- Vidal, G. and Ford, T. D. (1985) Microbiotas from the late Proterozoic Chuar Group (northern Arizona) and Uinta Mountain Group (Utah) and their chronostratigraphic implications. *Precambrian Res* 28:349-389.
- Vidal, G. and Siedlecka, A. (1983) Planktonic, acid-resistant microfossils from the upper Proterozoic strata of the Barents Sea region of Varanger Peninsula, East Finnmark, Northern Norway. *Norges Geologiske Undersøkelse Bulletin* 71:45-79.
- Vorob'eva, N.G., Sergeev, V.N., and Knoll, A.H. (2009) Neoproterozoic microfossils from the northeastern margin of the East European Platform. *J Paleontol* 83:161-196.
- Wallace, M.W., Shuster, A., Greig, A., Planavsky, N.J., and Reed, C.P. (2017) Oxygenation history of the Neoproterozoic to early Phanerozoic and the rise of land plants. *Earth Planet Sci Lett* 466:12-19.
- Xiao, S., Knoll, A.H., Yuan, X., and Poeschel, C.M. (2004) Phosphatized multicellular algae in the Neoproterozoic Doushantuo Formation, China, and the early evolution of florideophyte red algae. *Am J Botany* 91:214-227.
- Xiao, S., Yuan, X., Steiner, M., and Knoll, A.H. (2002) Macroscopic carbonaceous compressions in a terminal Proterozoic shale: a systematic reassessment of the Miaohé biota, South China. *J Paleontol* 76:347-376.
- Xiao, S., Shen, B., Tang, Q., Kaufman, A.J., Yuan, X., Li, J., and Qian, M. (2014a) Biostratigraphic and chemostratigraphic constraints on the age of early Neoproterozoic carbonate successions in North China. *Precambrian Res* 246:208-225.
- Xiao, S., Zhou, C., Liu, P., Wang, D., and Yuan, X. (2014b) Phosphatized acanthomorphic acritarchs and related microfossils from the Ediacaran Doushantuo Formation at Weng'an (South China) and their implications for biostratigraphic correlation. *J Paleontol* 88:1-67.
- Xunlai, Y., Jun, L., and Ruiji, C.A. (1999) Diverse metaphyte assemblage from the Neoproterozoic black shales of South China. *Lethaia* 32:143-155.
- Yang, S., Kendall, B., Lu, X., Zhang, F., and Zheng, W. (2017) Uranium isotope compositions of mid-Proterozoic black shales: Evidence for an episode of increased ocean oxygenation at 1.36 Ga and evaluation of the effect of post-depositional hydrothermal fluid flow. *Precambrian Res* 298:187-201.
- Yin, X., Yuan, X., Meng, F., and Hu, J. (2005) Protists of the Upper Mesoproterozoic Ruyang Group in Shanxi Province, China. *Precambrian Res* 141:49-66.
- Yuan, X., Xiao, S., Li, J., Yin, L., and Cao, R. (2001) Pyritized chuarids with excystment structures from the late Neoproterozoic Lantian Formation in Anhui, South China. *Precambrian Res* 107:253-263.

Zhang, S., Wang, X., Wang, H., Bjerrum, C.J., Hammarlund, E.U., Costa, M.M., Connelly, J.N., Zhang, B., Su, J., and Canfield, D.E. (2016) Sufficient oxygen for animal respiration 1,400 million years ago. *Proc Natl Acad Sci USA* 113:1731-1736.

Zang, W. L. (1995) Early Neoproterozoic sequence stratigraphy and acritarch biostratigraphy, eastern Officer Basin, South Australia. *Precambrian Res* 74:119-175.

Zang, W. and Walter, M.R. (1992) *Late Proterozoic and Cambrian microfossils and biostratigraphy, Amadeus basin, central Australia*. (Association of the Australasian Palaeontologists).

Zhang, Z. (1997) A new Palaeoproterozoic clastic-facies microbiota from the Changzhougou Formation, Changcheng Group, Jixian, north China. *Geol Mag* 134:145-150.

Zhu, S., Zhu, M., Knoll, A.H., Yin, Z., Zhao, F., Sun, S., Qu, Y., Shi, M., and Liu, H. (2016) Decimetre-scale multicellular eukaryotes from the 1.56-billion-year-old Gaoyuzhuang Formation in North China. *Nature Comm* 7:1-8.
